# Supplementary material
Source: PubMed Central journal article supplement (PMC4884543)
Supplement: NIHMS727281-supplement.pdf [file NIHMS727281-supplement.pdf]

## **Reduced Brain Cannabinoid Receptor Availability in Schizophrenia**

### ***Supplemental Information***

#### **Screening Procedures**

A Structured Clinical Interview for DSM-IV-TR was conducted to verify a diagnosis of schizophrenia and to confirm the absence of any DSM-IV Axis I or II disorder in the healthy controls. Screening tests included electrocardiogram, hematology, chemistry, thyroid function tests, PT/PTT, and urinalysis and an Allen's test. Spot urine drug test, breathalyzer and urine toxicology for drugs were done at screening to confirm abstinence from illicit drug use. Detailed history of lifetime exposure to cannabis, other drugs and alcohol was assessed. A Time Line Follow Back approach for 6 months prior to screening was done to quantify drug and alcohol exposure (including) cannabis use. Subjects' status as nonsmokers (tobacco) was ascertained by self-report, the Fagerstrom Test for Nicotine Dependence, and breath carbon monoxide levels.

#### **Magnetic Resonance Imaging Methodology**

MRI scans were conducted before the PET scans to 1) exclude individuals with anatomical abnormalities, and 2) to co-register PET and MRI for image analysis. MR imaging was performed on a 3T Trio (Siemens Medical Solutions, Erlangen, Germany) with a circularly polarized head coil. MR acquisition was a Sag 3D magnetization-prepared rapid gradient-echo sequence.

**Table S1. Postmortem Findings of CB1R in Schizophrenia**

| Author                              | Method                                                                                                     | Finding    | Region                          |
|-------------------------------------|------------------------------------------------------------------------------------------------------------|------------|---------------------------------|
| Dean <i>et al.</i> , 2001 (1)       | Autoradiography: [ <sup>3</sup> H]CP-55940 (CB1R agonist)                                                  | Increased  | DLPFC                           |
|                                     |                                                                                                            | No change  | CP, temporal lobe               |
| Zavitsanou <i>et al.</i> , 2004 (2) | Autoradiography:[ <sup>3</sup> H]SR141716A (CB1R antagonist)                                               | Increased  | ACC                             |
| Newell <i>et al.</i> , 2006 (3)     | Autoradiography: [ <sup>3</sup> H]CP-55940 (CB1R agonist)                                                  | Increased  | PCC                             |
| Deng <i>et al.</i> , 2007 (4)       | Autoradiography: [ <sup>3</sup> H]CP-55940 (CB1R agonist) and [ <sup>3</sup> H]SR141716A (CB1R antagonist) | No change  | STG                             |
| Koethe <i>et al.</i> , 2007 (5)     | Immunohistochemistry                                                                                       | No change  | ACC, DLPFC                      |
| Eggan <i>et al.</i> , 2008 (6)      | In situ hybridization                                                                                      | Decreased  | DLPFC                           |
|                                     | Immunocytochemistry                                                                                        | Decreased  |                                 |
| Urighuen <i>et al.</i> , 2009 (7)   | Immunocytochemistry                                                                                        | Decreased  | PFC (*in un-medicated patients) |
|                                     |                                                                                                            | No change* |                                 |
| Eggan <i>et al.</i> , 2010 (8)      | Immunohistochemistry                                                                                       | Decreased  | DLPFC                           |
| Dalton <i>et al.</i> , 2011(9)      | Autoradiography: [ <sup>3</sup> H]CP-55940 (CB1R agonist)                                                  | Increased  | DLPFC                           |
|                                     | Immunocytochemistry                                                                                        | No change  |                                 |
| Jenko <i>et al.</i> , 2012 (10)     | Autoradiography: [ <sup>3</sup> H]MePPEP (CB1R inverse agonist)                                            | Increased  | DLPFC                           |
| Volk <i>et al.</i> , 2014 (11)      | Autoradiography: [ <sup>3</sup> H]-OMAR (CB1R inverse agonist)                                             | Increased  | DLPFC                           |
|                                     | In situ hybridization (CB1R mRNA)                                                                          | Decreased  |                                 |
|                                     | Immunohistochemistry (CB1R protein)                                                                        | Decreased  |                                 |

ACC, anterior cingulate cortex; CP, caudate-putamen; DLPFC, dorsolateral prefrontal cortex; PCC, posterior cingulate cortex; PFC, prefrontal cortex; STG, superior temporal gyrus.

**Table S2.** Statistical Results for OMAR  $V_T$  Data Across All Subject Groups

|                                         | Composite Score | Amygdala | Caudate | Cerebellum | Cingulum_Ant | Cingulum_Post | Frontal | Hippocampus | Hypothalamus | Insula | Occipital | Pallidum | Parietal | Putamen | Temporal | Thalamus |
|-----------------------------------------|-----------------|----------|---------|------------|--------------|---------------|---------|-------------|--------------|--------|-----------|----------|----------|---------|----------|----------|
| <b>Free Fraction Unadjusted Results</b> |                 |          |         |            |              |               |         |             |              |        |           |          |          |         |          |          |
| SCZ vs. HC                              | 0.02*           | 0.03*    | 0.00*   | ns         | 0.06         | 0.00*         | ns      | 0.03*       | 0.02*        | 0.03*  | ns        | ns       | 0.09     | 0.08    | ns       | 0.06     |
| SCZ_Unmed vs. HC                        | 0.03*           | 0.03*    | 0.03*   | ns         | ns           | 0.03*         | ns      | 0.06        | 0.08         | 0.06   | ns        | 0.02*    | ns       | 0.06    | ns       | 0.09     |
| SCZ_Med vs. HC                          | 0.07            | ns       | 0.06    | ns         | ns           | 0.02*         | ns      | ns          | 0.06         | ns     | ns        | ns       | ns       | ns      | ns       | ns       |
| SCZ_Unmed vs. SCZ_Med                   | ns              | ns       | ns      | ns         | ns           | ns            | ns      | ns          | ns           | ns     | ns        | 0.06     | ns       | ns      | ns       | ns       |
| SCZ-Nonsmokers vs. HC                   | 0.01*           | 0.04*    | 0.03*   | 0.09       | 0.06         | 0.01*         | 0.05*   | 0.05*       | 0.04*        | 0.04*  | 0.05*     | 0.05*    | 0.03*    | 0.05*   | 0.09     | ns       |
| SCZ-Smokers vs. HC                      | ns              | ns       | 0.08    | ns         | ns           | 0.08          | ns      | ns          | ns           | ns     | ns        | ns       | ns       | ns      | ns       | ns       |
| SCZ-Nonsmokers vs. SCZ-Smokers          | ns              | ns       | ns      | 0.09       | ns           | ns            | 0.06    | ns          | ns           | ns     | 0.05*     | ns       | 0.02*    | ns      | 0.08     | ns       |
| <b>Free Fraction Adjusted Results</b>   |                 |          |         |            |              |               |         |             |              |        |           |          |          |         |          |          |
| SCZ vs. HC                              | 0.00*           | 0.03*    | 0.02*   | 0.05*      | 0.00*        | 0.01*         | 0.04*   | 0.02*       | 0.01*        | 0.02*  | 0.04*     | 0.02*    | 0.03*    | 0.03*   | 0.04*    | 0.03*    |
| SCZ_Unmed vs. HC                        | 0.00*           | 0.02*    | 0.02*   | 0.04*      | 0.00*        | 0.02*         | 0.03*   | 0.02*       | 0.03*        | 0.02*  | 0.03*     | 0.01*    | 0.03*    | 0.02*   | 0.03*    | 0.03*    |
| SCZ_Med vs. HC                          | 0.02*           | 0.09     | 0.07    | ns         | 0.00*        | 0.04*         | ns      | 0.08        | 0.04*        | 0.08   | ns        | 0.07     | ns       | ns      | ns       | ns       |
| SCZ_Unmed vs. SCZ_Med                   | ns              | ns       | ns      | ns         | ns           | ns            | ns      | ns          | ns           | ns     | ns        | ns       | ns       | ns      | ns       | ns       |
| SCZ-Nonsmokers vs. HC                   | 0.00*           | 0.05*    | 0.04*   | 0.06       | 0.00*        | 0.02*         | 0.04*   | 0.04*       | 0.03*        | 0.04*  | 0.04*     | 0.03*    | 0.04*    | 0.04*   | 0.05*    | 0.06     |
| SCZ-Smokers vs. HC                      | 0.05*           | ns       | 0.08    | ns         | 0.00*        | 0.07          | ns      | ns          | 0.07         | ns     | ns        | 0.09     | ns       | ns      | ns       | ns       |
| SCZ-Nonsmokers vs. SCZ-Smokers          | ns              | ns       | ns      | ns         | ns           | ns            | ns      | ns          | ns           | ns     | ns        | ns       | ns       | ns      | ns       | ns       |

All values represent  $p$ -values of post-hoc F-tests derived from linear mixed models of 1) Free fraction unadjusted OMAR  $V_T$  between HCs and SCZ groups [top half of table] and 2) Free fraction adjusted OMAR  $V_T$  between HCs and SCZ groups [bottom half of table]. (\*:  $p \leq 0.05$ ; ns:  $p \geq 0.1$ )

**Table S3. Group Differences in ROI Volume and  $V_T$  after Gray Matter Masking**

| Regions of Interest | ROI Volume with GM Masking |        |        | $V_T$ with GM Masking |      |        |
|---------------------|----------------------------|--------|--------|-----------------------|------|--------|
|                     | HCs                        | SCZs   | % Diff | HCs                   | SCZs | % Diff |
| ACC                 | 14.00                      | 13.51  | -3.56  | 1.81                  | 1.50 | -21.10 |
| PCC                 | 3.74                       | 3.51   | -6.67  | 1.46                  | 1.17 | -24.54 |
| Insula              | 20.97                      | 20.49  | -2.35  | 1.76                  | 1.47 | -19.66 |
| Frontal Cortex      | 126.52                     | 120.31 | -5.17  | 1.71                  | 1.48 | -15.59 |
| Parietal Cortex     | 32.70                      | 30.92  | -5.78  | 1.61                  | 1.40 | -14.74 |
| Temporal Cortex     | 97.73                      | 96.37  | -1.42  | 1.66                  | 1.45 | -14.81 |
| Occipital Cortex    | 44.81                      | 42.52  | -5.39  | 1.55                  | 1.35 | -15.09 |
| <b>Mean</b>         |                            |        | -4.33  |                       |      | -17.93 |
| <b>SD</b>           |                            |        | 1.93   |                       |      | 3.88   |

## Supplementary References

1. Dean B, Sundram S, Bradbury R, Scarr E, Copolov D (2001): Studies on [3H]CP-55940 binding in the human central nervous system: regional specific changes in density of cannabinoid-1 receptors associated with schizophrenia and cannabis use. *Neuroscience*. 103:9-15.
2. Zavitsanou K, Garrick T, Huang XF (2004): Selective antagonist [3H]SR141716A binding to cannabinoid CB1 receptors is increased in the anterior cingulate cortex in schizophrenia. *Progress in Neuro-Psychopharmacology & Biological Psychiatry*. 28:355-360.
3. Newell KA, Deng C, Huang XF (2006): Increased cannabinoid receptor density in the posterior cingulate cortex in schizophrenia. *Exp Brain Res*. 172:556-560.
4. Deng C, Han M, Huang XF (2007): No changes in densities of cannabinoid receptors in the superior temporal gyrus in schizophrenia. *Neuroscience bulletin*. 23:341-347.
5. Koethe D, Llenos IC, Dulay JR, Hoyer C, Torrey EF, Leweke FM, *et al.* (2007): Expression of CB1 cannabinoid receptor in the anterior cingulate cortex in schizophrenia, bipolar disorder, and major depression. *J Neural Transm*. 114:1055-1063.
6. Eggan SM, Hashimoto T, Lewis DA (2008): Reduced cortical cannabinoid 1 receptor messenger RNA and protein expression in schizophrenia. *Arch Gen Psychiatry*. 65:772-784.
7. Uriguen L, Garcia-Fuster MJ, Callado LF, Morentin B, La Harpe R, Casado V, *et al.* (2009): Immunodensity and mRNA expression of A2A adenosine, D2 dopamine, and CB1 cannabinoid receptors in postmortem frontal cortex of subjects with schizophrenia: effect of antipsychotic treatment. *Psychopharmacology (Berl)*. 206:313-324.
8. Eggan SM, Stoyak SR, Verrico CD, Lewis DA (2010): Cannabinoid CB1 receptor immunoreactivity in the prefrontal cortex: Comparison of schizophrenia and major depressive disorder. *Neuropsychopharmacology*. 35:2060-2071.
9. Dalton VS, Long LE, Weickert CS, Zavitsanou K (2011): Paranoid schizophrenia is characterized by increased CB1 receptor binding in the dorsolateral prefrontal cortex. *Neuropsychopharmacology*. 36:1620-1630.
10. Jenko KJ, Hirvonen J, Henter ID, Anderson KB, Zoghbi SS, Hyde TM, *et al.* (2012): Binding of a tritiated inverse agonist to cannabinoid CB1 receptors is increased in patients with schizophrenia. *Schizophr Res*. 141:185-188.
11. Volk DW, Eggan SM, Horti AG, Wong DF, Lewis DA (2014): Reciprocal alterations in cortical cannabinoid receptor 1 binding relative to protein immunoreactivity and transcript levels in schizophrenia. *Schizophr Res*. 159:124-129.
